# Supplementary material
Source: PubMed Central journal article supplement (PMC7241940)
Supplement: ajh_33_6_473_s2.pdf [file ajh_33_6_473_s2.pdf]

**Genomic determinants of hypertension with a focus on metabolomics and the gut microbiome**

Panayiotis Louca, Cristina Menni, Sandosh Padmanabhan

Supplementary Table: Metabolites associated with blood pressure and hypertension

| Metabolite                               | Super Pathway | Sub pathway             | HMDB ID     | Of microbial origin | Metabolite Trend | BP trait        | Ref   |
|------------------------------------------|---------------|-------------------------|-------------|---------------------|------------------|-----------------|-------|
| 1-arachidonoylglycerophosphoethanolamine | Lipid         | Lysolipid               | HMDB0011517 | No                  | ↑   ↑            | SBP   DBP       | 26    |
| 1-myristoylglycerophosphocholine         | Lipid         | Lysolipid               | HMDB0010379 | Yes                 | ↑   ↑            | SBP   DBP       | 26    |
| 1-palmitoleoylglycerophosphocholine      | Lipid         | Lysolipid               | HMDB0010383 | Yes                 | ↑   ↑            | SBP   DBP       | 26    |
| 1-palmitoylglycerol (1-monopalmitin)     | Lipid         | Lysolipid               | HMDB0011564 | No                  | ↑   ↑            | SBP   DBP       | 26    |
| 1-stearoylglycerol (1-monostearin)       | Lipid         | Lysolipid               | HMDB0011131 | No                  | ↑   ↑            | SBP   DBP       | 26    |
| 1,7-dimethylurate                        | Lipid         | Phospholipid Metabolism | HMDB0011103 | No                  | ↑   ↑   ↑        | SBP   DBP   HTN | 26,60 |
| 10-HDoHE                                 | Lipid         | Phospholipid Metabolism | HMDB0060037 | No                  | ↑                | HTN             | 79    |
| 10-heptadecenoate (17:1n7)               | Lipid         | Phospholipid Metabolism | HMDB0060038 | No                  | ↑   ↑            | SBP   DBP       | 26    |
| 10-nonadecenoate (19:1n9)                | Lipid         | Long Chain Fatty Acid   | HMDB13622   | No                  | ↑   ↑            | SBP   DBP       | 26    |
| 10-undecenoate (11:1n1)                  | Lipid         | Medium Chain Fatty Acid | HMDB0029585 | No                  | ↑   ↑            | SBP   DBP       | 26    |
| 2 hydroxyvaleric acid                    | Lipid         | Phospholipid Metabolism | HMDB0001863 | No                  |                  | SBP   DBP       | 80    |

|                                   |             |                                                  |             |     |           |                 |       |
|-----------------------------------|-------------|--------------------------------------------------|-------------|-----|-----------|-----------------|-------|
| 2-Aminoethanethiol                | Amino Acid  | Methionine, Cysteine, SAM and Taurine Metabolism | HMDB0002991 | No  | ↑         | HTN             | 81    |
| 2-Aminophenol                     | Lipid       | Fatty Acid, Amino                                | HMDB0061116 | No  | ↑         | HTN             | 81    |
| 2-hydroxybutyrate (AHB)           | Lipid       | Fatty Acid, Dicarboxylate                        | HMDB0000008 | Yes | ↑   ↑     | SBP   DBP       | 26,80 |
| 2-hydroxyhippurate (salicylurate) | Xenobiotics | Benzoate Metabolism                              | HMDB00840   | Yes | ↑         | SBP   DBP   HTN | 60    |
| 2-hydroxyisobutyrate              | Xenobiotics | Drug                                             | HMDB0000729 | Yes | ↑         | HTN             | 60    |
| 2-Methoxyestrone                  | Xenobiotics | Drug                                             | HMDB0000010 | No  | ↑         | HTN             | 81    |
| 2-tetradecenoyl carnitine         | Lipid       | Lysolipid                                        | HMDB0013329 | No  | ↑   ↑     | SBP   DBP       | 26    |
| 3-(4-hydroxyphenyl)lactate        | Amino Acid  | Phenylalanine and Tyrosine Metabolism            | HMDB00755   | Yes | ↑   ↑     | SBP   DBP       | 26    |
| 3-hydroxybutyrate (BHBA)          | Xenobiotics | Drug                                             | HMDB0000357 | Yes | ↑   ↑   ↑ | SBP   DBP   HTN | 26,82 |
| 3-Hydroxyhippuric acid            | Xenobiotics | Drug                                             | HMDB0006116 | Yes | ↑         | HTN             | 79    |
| 3-indoxyl sulfate                 | Amino Acid  | Tryptophan Metabolism                            | HMDB0000682 | Yes | ↓   ↓     | SBP   DBP       | 26    |
| 3-methyl-2-oxobutyrate            | Amino Acid  |                                                  | HMDB0000019 | Yes | ↑   ↑     | SBP   DBP       | 26    |
| 3-methyl-2-oxovalerate            | Amino Acid  |                                                  | HMDB0000491 | Yes | ↑   ↑     | SBP   DBP       | 26    |
| 3-Oxododecanoic acid              | Lipid       | Fatty acid                                       | HMDB0010727 | No  | ↑         | HTN             | 79    |

|                                                  |                    |                                       |                           |     |       |                        |    |
|--------------------------------------------------|--------------------|---------------------------------------|---------------------------|-----|-------|------------------------|----|
| 3-Hydroxyisovalerylcarnitine / Octanoylcarnitine | Amino Acid / lipid | Medium Chain Fatty Acid               | HMDB0061189 / HMDB0000791 | No  | ↑     | HTN                    | 83 |
| 3-Hydroxy-tetradecanoylcarnitine                 | Lipid              | Fatty acid                            | HMDB61640                 | No  | ↓     | HTN                    | 83 |
| 3,4,5-trimethoxycinnamic acid                    |                    |                                       | HMDB0002511               | Yes | ↓     | HTN and pre-HTN        | 27 |
| 4-androsten-3beta,17beta-diol disulfate 1        | Lipid              | Steroid                               | HMDB0240429               | No  | ↑   ↑ | SBP   DBP              | 26 |
| 4-Hydroxybenzaldehyde                            | Amino Acid         | Guanidino and Acetamido Metabolism    | HMDB0011718               | Yes | ↑     | HTN                    | 79 |
| 4-hydroxyhippurate                               | Xenobiotics        | Benzoate Metabolism                   | HMDB0013678               | Yes | ↑     | HTN                    | 60 |
| 4,8 Dimethylnonanoyl carnitine                   | Xenobiotics        | Benzoate Metabolism                   | HMDB06202                 | No  | ↑     | HTN                    | 79 |
| 5-dodecenoate (12:1n7)                           | Xenobiotics        | Xanthine Metabolism                   | HMDB0000529               | No  | ↑   ↑ | SBP   DBP              | 26 |
| 5alpha-androstan-3beta,17beta-diol disulfate     | Lipid              | Steroid                               | HMDB00493                 | No  | ↑     | HTN                    | 60 |
| Acetate                                          | Xenobiotics        | Xanthine Metabolism                   | HMDB0000042               | Yes | ↓     | Average BP (SBP   DBP) | 84 |
| acetylcarnitine                                  | Lipid              | Fatty Acid Metabolism(Acyl Carnitine) | HMDB00201                 | No  | ↑   ↑ | SBP   DBP              | 26 |
| acetylphosphate                                  | Lipid              | Fatty Acid Metabolism(Acyl Carnitine) | HMDB0001494               | No  | ↑   ↑ | SBP   DBP              | 26 |
| Adenine                                          | Nucleotide         | Purine Metabolism, Adenine containing | HMDB00034                 | No  | ↑     | HTN                    | 85 |

|                                      |                  |                                              |                                |     |              |                    |       |
|--------------------------------------|------------------|----------------------------------------------|--------------------------------|-----|--------------|--------------------|-------|
| Alanine                              | Amino Acid       | Alanine and Aspartate Metabolism             | HMDB00161                      | No  | ↑   ↑        | SBP   DBP          | 26,59 |
| alpha-hydroxyisovalerate             | Amino Acid       | Leucine, Isoleucine and Valine Metabolism    | HMDB00407                      | Yes | ↑   ↑        | SBP   DBP          | 26    |
| alpha-ketoglutarate                  | Energy Cofactors | TCA Cycle                                    | HMDB00208                      | No  | ↑   ↑        | SBP   DBP          | 26    |
| Alpha-tocopherol                     | and Vitamins     | Tocopherol Metabolism                        | HMDB01893                      | No  | ↑            | HTN                | 81    |
| androsterone sulfate                 | Lipid            | Steroid                                      | HMDB02759                      | No  | ↑            | HTN                | 60    |
| Arabinose                            | Amino Acid       | Tryptophan Metabolism                        | HMDB000064<br>6                | No  |              | SBP   DBP          | 80    |
| Arachidonic acid                     | Lipid            | Polyunsaturated Fatty Acid (n3 and n6)       | HMDB01043                      | No  |              | SBP   DBP          | 80    |
| Aspartic acid                        | Amino Acid       | Alanine and Aspartate Metabolism             | HMDB00191                      | No  | ↑            | HTN                | 81    |
| bilirubin                            | Xenobiotics      | Food Component/Plant                         | HMDB00054                      | No  | ↑   ↑        | SBP   DBP          | 26    |
| Butyrylcarnitine / Octanoylcarnitine | Lipid            | Fatty Acid Metabolism (also BCAA Metabolism) | HMDB02013 /<br>HMDB000079<br>1 | No  | ↑            | HTN                | 83    |
| caffeine                             | Xenobiotics      | Xanthine Metabolism                          | HMDB01847                      | No  | ↑   ↑        | SBP   DBP          |       |
| Capric acid                          | Lipid            | Medium Chain Fatty Acid                      | HMDB00511                      | No  | ↑   ↑  <br>↓ | SBP   DBP  <br>HTN | 26,85 |
| Caprylic acid                        | Lipid            | Medium Chain Fatty Acid                      | HMDB00482                      | No  |              | SBP   DBP          | 80    |
| cholesterol                          | Lipid            | Sterol                                       | HMDB00067                      | Yes | ↑   ↑        | SBP   DBP          | 26    |
| citrate                              | Energy           | TCA Cycle                                    | HMDB00094                      | No  | ↑   ↑        | SBP   DBP          | 26    |
| Citrulline                           | Amino Acid       | Urea cycle; Arginine and Proline Metabolism  | HMDB000090<br>4                | No  | ↓            | HTN                | 85    |
| cortisol                             | Lipid            | Steroid                                      | HMDB00063                      | No  | ↑   ↑        | SBP   DBP          | 26    |

|                                          |            |                                                  |                                                    |    |              |                    |       |
|------------------------------------------|------------|--------------------------------------------------|----------------------------------------------------|----|--------------|--------------------|-------|
| cortisone                                | Lipid      | Steroid                                          | HMDB02802                                          | No | ↑   ↑        | SBP   DBP          | 26    |
| cysteine                                 | Amino Acid | Methionine, Cysteine, SAM and Taurine Metabolism | HMDB00574                                          | No | ↑   ↑        | SBP   DBP          | 26    |
| Decadienoylcarnitine / Decanoylcarnitine | Nucleotide | Pyrimidine Metabolism, Cytidine containing       | HMDB00089                                          | No | ↑            | HTN                | 83    |
| Decanoylcarnitine                        | Lipid      | Fatty Acid Metabolism(Acyl Carnitine)            | HMDB000065<br>1<br>HMDB000709<br>8 /<br>HMDB000715 | No | ↑   ↑  <br>↓ | SBP   DBP  <br>HTN | 26,83 |
| DG 16:0/18:0                             | Lipid      | Fatty acid                                       | 8 /<br>HMDB000715<br>8<br>HMDB000709               | No | ↑   ↑        | SBP   MAP          | 86    |
| DG 16:0/20:3                             | Lipid      | Fatty acid                                       | 8 /<br>HMDB000744<br>8<br>HMDB000709               | No | ↑            | SBP                | 86    |
| DG 16:0/22:5                             | Lipid      | Fatty acid                                       | 8 /<br>HMDB005636<br>3<br>HMDB000709               | No | ↑   ↑  <br>↑ | SBP   DBP  <br>MAP | 86    |
| DG 16:0/22:6                             | Lipid      | Fatty acid                                       | 8 /<br>HMDB005638<br>6<br>HMDB000712               | No | ↑   ↑        | SBP   MAP          | 86    |
| DG 16:1/18:1                             | Lipid      | Fatty acid                                       | 4 /<br>HMDB000699<br>5<br>HMDB000715               | No | ↑   ↑        | DBP   MAP          | 86    |
| DG 18:0/18:1                             | Lipid      | Fatty acid                                       | 8 /                                                | No | ↑            | DBP                | 86    |

|                                       |               |                                                |                   |     |       |           |    |
|---------------------------------------|---------------|------------------------------------------------|-------------------|-----|-------|-----------|----|
|                                       |               |                                                | HMDB000699        |     |       |           |    |
|                                       |               |                                                | 5                 |     |       |           |    |
|                                       |               |                                                | HMDB000715        |     |       |           |    |
| DG 18:0/20:4                          | Lipid         | Fatty acid                                     | 8 /<br>HMDB011598 | No  | ↑   ↑ | SBP   MAP | 86 |
|                                       |               |                                                | 7                 |     |       |           |    |
|                                       |               |                                                | HMDB009331        |     |       |           |    |
| DG(14:0/22:5)                         | Lipid         | Fatty acid                                     | 9 /<br>HMDB005636 | No  | ↑     | HTN       | 79 |
|                                       |               |                                                | 3                 |     |       |           |    |
|                                       |               |                                                | HMDB000706        |     |       |           |    |
| DG(15:0/18:3)                         | Lipid         | Fatty acid                                     | 7 /<br>HMDB000727 | No  | ↑     | HTN       | 79 |
|                                       |               |                                                | 4                 |     |       |           |    |
|                                       |               |                                                | HMDB000706        |     |       |           |    |
| DG(15:0/18:4)                         | Lipid         | Fatty acid                                     | 7 /<br>HMDB000733 | No  | ↑     | HTN       | 79 |
|                                       |               |                                                | 0                 |     |       |           |    |
| dihomo-linolenate<br>(20:3n3 or n6)   | Lipid         | Polyunsaturated Fatty Acid (n3<br>and n6)      | HMDB006186        | No  | ↑   ↑ | SBP   DBP | 26 |
|                                       |               |                                                | 4                 |     |       |           |    |
| Dihydroabiatic acid                   | Lipid         | Polyunsaturated Fatty Acid (n3<br>and n6)      |                   | No  |       | SBP   DBP | 80 |
| Dihydroxyacetone                      | Nucleotide    | Pyrimidine Metabolism, Orotate<br>containing   | HMDB000188        | No  | ↑     | HTN       | 81 |
|                                       |               |                                                | 2                 |     |       |           |    |
| dimethylarginine (SDMA +<br>ADMA)     | Amino<br>Acid | Urea cycle; Arginine and Proline<br>Metabolism | HMDB01539         | No  | ↓   ↓ | SBP   DBP | 26 |
| dimethylglycine                       | Amino<br>Acid | Glycine, Serine and Threonine<br>Metabolism    | HMDB00092         | Yes | ↑     | HTN       | 60 |
| docosapentaenoate (n3<br>DPA; 22:5n3) | Lipid         | Polyunsaturated Fatty Acid (n3<br>and n6)      | HMDB01976         | No  | ↑   ↑ | SBP   DBP | 26 |

|                                         |              |                                                      |                                |     |       |                 |       |
|-----------------------------------------|--------------|------------------------------------------------------|--------------------------------|-----|-------|-----------------|-------|
| dodecanedioate                          | Lipid        | Fatty Acid, Dicarboxylate                            | HMDB00623                      | No  | ↑   ↑ | SBP   DBP       | 26    |
| Dodecanol                               | Lipid        | Fatty Acid, Dicarboxylate                            | HMDB001162<br>6                | No  |       | SBP   DBP       | 80    |
| eicosenoate (20:1n9 or 11)              | Lipid        | Long Chain Fatty Acid                                | HMDB02231                      | No  | ↑   ↑ | SBP   DBP       | 26    |
| erythritol                              | Xenobiotics  | Food Component/Plant                                 | HMDB02994                      | No  | ↑   ↑ | SBP   DBP       | 26    |
| erythronate                             | Carbohydrate |                                                      | HMDB000061<br>3                | No  | ↑   ↑ | SBP   DBP       | 26    |
| Formate                                 | Lipid        |                                                      | HMDB000014<br>2                | Yes | ↓     | SBP   DBP       | 59    |
| Fumaric acid                            | Energy       | TCA Cycle                                            | HMDB00134                      | No  | ↑     | SBP   DBP   HTN | 80,85 |
| Galactose                               | Carbohydrate | Fructose, Mannose and Galactose Metabolism           | HMDB00565                      | No  | ↑     | HTN             | 81    |
| gamma-glutamylglutamine                 | Peptide      | Gamma-glutamyl Amino Acid                            | HMDB11738                      | No  | ↓   ↓ | SBP   DBP       | 26    |
| Glucose                                 | Carbohydrate | Glycolysis, Gluconeogenesis, and Pyruvate Metabolism | HMDB00122                      | Yes | ↑   ↑ | SBP   DBP       | 26    |
| Glucose-1-phosphate                     | Carbohydrate | Glycolysis, Gluconeogenesis, and Pyruvate Metabolism | HMDB000158<br>6                | Yes | ↓     | HTN             | 81    |
| Glutaryl carnitine                      | Amino Acid   | Lysine Metabolism                                    | HMDB13130                      | No  | ↓     | HTN             | 83    |
| Glutaryl carnitine / Octanoyl carnitine | Amino Acid   | Lysine Metabolism                                    | HMDB13130 /<br>HMDB000079<br>1 | No  | ↑     | HTN             | 83    |
| Gly-Pro                                 | Amino Acid   | Dipeptide                                            | HMDB000072<br>1                | No  | ↑     | HTN             | 81    |
| Gly/Ala                                 | Amino Acid   | Dipeptide                                            | HMDB000012<br>3 /              | No  | ↓     | HTN             | 83    |



|                    |                 |                                                |                 |     |              |                    |                 |  |
|--------------------|-----------------|------------------------------------------------|-----------------|-----|--------------|--------------------|-----------------|--|
|                    |                 |                                                | HMDB000016<br>1 |     |              |                    |                 |  |
| Glycerol           | Lipid           | Glycerolipid Metabolism                        | HMDB00131       | Yes | ↑   ↑  <br>↑ | HTN   SBP  <br>DBP | 26,60,7<br>9,85 |  |
| Glycine            | Amino<br>Acid   | Glycine, Serine and Threonine<br>Metabolism    | HMDB00123       | No  | ↓ ↑          | HTN                | 81,83,8<br>5    |  |
| Glycolic acid      | Lipid           | Secondary Bile Acid Metabolism                 | HMDB000011<br>5 | No  |              | SBP   DBP          | 80              |  |
| Hexadecanedioate   | Lipid           | Fatty Acid, Dicarboxylate                      | HMDB00672       | No  | ↑   ↑  <br>↑ | SBP   DBP  <br>HTN | 26,79           |  |
| hexanoylcarnitine  | Lipid           | Fatty Acid Metabolism(Acyl<br>Carnitine)       | HMDB00705       | No  | ↑   ↑        | SBP   DBP          | 26              |  |
| Hippurate          | Xenobiotic<br>s | Benzoate Metabolism                            | HMDB00714       | Yes | ↑   ↑        | SBP   DBP          | 75              |  |
| HWESASXX           | Amino<br>Acid   | Urea cycle; Arginine and Proline<br>Metabolism |                 | No  | ↑   ↑        | SBP   DBP          | 26              |  |
| Iminodiacetic acid | Amino<br>Acid   | Histidine Metabolism                           | HMDB001175<br>3 | No  |              | SBP   DBP          | 80              |  |
| L-Acetylcarnitine  | Amino<br>Acid   | Tryptophan Metabolism                          | HMDB000020<br>1 | No  | ↑            | HTN                | 79              |  |
| l-asparagine       | Amino<br>Acid   | Tryptophan Metabolism                          | HMDB000016<br>8 | No  | ↓            | HTN                | 85              |  |
| l-cystine          | Amino<br>Acid   | Tryptophan Metabolism                          | HMDB000019<br>2 | No  | ↓            | HTN                | 85              |  |
| l-glutamine        | Amino<br>Acid   | Tryptophan Metabolism                          | HMDB000064<br>1 | No  | ↓            | HTN                | 85              |  |
| l-isoleucine       | Amino<br>Acid   | Tryptophan Metabolism                          | HMDB000017<br>2 | No  | ↓            | HTN                | 85              |  |
| l-lysine           | Amino<br>Acid   | Tryptophan Metabolism                          | HMDB000018<br>2 | Yes | ↓            | HTN                | 85              |  |

|                                            |              |                                                      |             |     |       |                 |       |
|--------------------------------------------|--------------|------------------------------------------------------|-------------|-----|-------|-----------------|-------|
| l-methionine                               | Amino Acid   | Tryptophan Metabolism                                | HMDB0000696 | No  | ↓     | HTN             | 85    |
| l-threonine                                | Amino Acid   | Tryptophan Metabolism                                | HMDB0000167 | No  | ↓     | HTN             | 85    |
| l-tryptophan                               | Amino Acid   | Tryptophan Metabolism                                | HMDB0000929 | No  | ↓     | HTN             | 85    |
| l-tyrosine                                 | Amino Acid   | Tryptophan Metabolism                                | HMDB0000158 | No  | ↓     | HTN             | 85    |
| l-valine                                   | Amino Acid   | Tryptophan Metabolism                                | HMDB0000883 | No  | ↓     | HTN             | 85    |
| lactate                                    | Carbohydrate | Glycolysis, Gluconeogenesis, and Pyruvate Metabolism | HMDB00190   | Yes | ↑   ↑ | SBP   DBP       | 26    |
| laurate (12:0)                             | Lipid        | Medium Chain Fatty Acid                              | HMDB0034840 | No  | ↑   ↑ | SBP   DBP       | 26    |
| Lauroylcarnitine                           | Lipid        | Medium Chain Fatty Acid                              | HMDB0002250 | No  | ↓   ↓ | HTN             | 79,83 |
| levulinate (4-oxovalerate)                 | Lipid        | Eicosanoid                                           | HMDB0040433 | Yes | ↑   ↑ | SBP   DBP       | 26    |
| linoleate (18:2n6)                         | Lipid        | Polyunsaturated Fatty Acid (n3 and n6)               | HMDB00673   | No  | ↑   ↑ | SBP   DBP       | 26    |
| linolenate [alpha or gamma; (18:3n3 or 6)] | Lipid        | Polyunsaturated Fatty Acid (n3 and n6)               | HMDB03073   | No  | ↑   ↑ | SBP   DBP       | 26    |
| LysoPC                                     | Amino Acid   | Lysine Metabolism                                    | HMDB0010382 | No  | ↓     | HTN and pre-HTN | 27    |
| LysoPC(16:1)                               | Amino Acid   | Lysine Metabolism                                    | HMDB0010383 | Yes | ↑     | HTN             | 79    |
| LysoPE                                     | Amino Acid   | Lysine Metabolism                                    | HMDB0011506 | No  | ↓     | HTN and pre-HTN | 27    |
| Lyxose                                     | Amino Acid   | Lysine Metabolism                                    | HMDB0003402 | No  | ↑     | HTN             | 81    |

|                                         |              |                                               |                                      |    |              |                    |       |
|-----------------------------------------|--------------|-----------------------------------------------|--------------------------------------|----|--------------|--------------------|-------|
| malate                                  | Energy       | TCA Cycle                                     | HMDB00156                            | No | ↑   ↑        | SBP   DBP          | 26    |
| Malonic acid                            | Lipid        | Fatty Acid Synthesis                          | HMDB00691                            | No | ↑            | HTN                | 81    |
| Malonylcarnitine /<br>Decanoylcarnitine | Lipid        | Fatty Acid Synthesis                          | HMDB000209<br>5 /<br>HMDB000065<br>1 | No | ↑            | HTN                | 83    |
| mannose                                 | Carbohydrate | Fructose, Mannose and<br>Galactose Metabolism | HMDB00169                            | No | ↑   ↑        | SBP   DBP          | 26    |
| margarate (17:0)                        | Lipid        | Long Chain Fatty Acid                         | HMDB000225<br>9                      | No | ↑   ↑        | SBP   DBP          | 26    |
| Melezitose                              | Lipid        | Long Chain Fatty Acid                         | HMDB001173<br>0                      | No | ↑            | HTN                | 81    |
| Methyl-beta-D-<br>galactopyranoside     |              |                                               | HMDB002996<br>5                      | No | ↑            | HTN                | 81    |
| Methylmalonic acid                      | Lipid        | Fatty acid                                    | HMDB000020<br>2                      | No | ↑            | HTN                | 81    |
| MHC 22:0                                | Lipid        | Glycerolipid Metabolism                       |                                      | No | ↑            | DBP                | 86    |
| MHC 24:0                                | Lipid        | Glycerolipid Metabolism                       |                                      | No | ↑   ↑        | DBP   MAP          | 86    |
| MHC 24:1                                | Lipid        | Glycerolipid Metabolism                       |                                      | No | ↑   ↑        | DBP   MAP          | 86    |
| myo-inositol                            | Lipid        | Inositol Metabolism                           | HMDB00211                            | No | ↑   ↑        | SBP   DBP          | 26    |
| Myristic acid                           | Lipid        | Long Chain Fatty Acid                         | HMDB00806                            | No | ↑   ↑  <br>↑ | SBP   DBP  <br>HTN | 26,79 |
| myristoleate (14:1n5)                   | Lipid        | Long Chain Fatty Acid                         | HMDB02000                            | No | ↑   ↑        | SBP   DBP          | 26    |
| N-Acetylarlyamine                       | Xenobiotics  | Food Component/Plant                          | HMDB000125<br>0                      | No | ↑            | HTN                | 79    |
| N-methyl-2-pyridone-5-<br>carboxamide   | Xenobiotics  | Food Component/Plant                          | HMDB000419<br>3                      | No | ↓   ↓        | SBP   DBP          | 75    |
| Nicotinoyl glycine                      |              |                                               | HMDB000326<br>9                      | No | ↑            | HTN                | 81    |
| nonadecanoate (19:0)                    | Lipid        | Long Chain Fatty Acid                         | HMDB00772                            | No | ↑   ↑        | SBP   DBP          | 26    |

|                       |                        |                                             |                         |     |           |                 |       |
|-----------------------|------------------------|---------------------------------------------|-------------------------|-----|-----------|-----------------|-------|
| Noradrenaline         |                        |                                             | HMDB0000216             | No  | ↑         | HTN             | 81    |
| octadecanedioate      | Lipid                  | Fatty Acid, Dicarboxylate                   | HMDB00782               | No  | ↑   ↑     | SBP   DBP       | 26    |
| Octadecanol           | Lipid                  | Fatty Acid, Dicarboxylate                   | HMDB0002350             | No  | ↑         | HTN             | 81    |
| Octanoylcarnitine     | Lipid                  | Fatty Acid Metabolism(Acyl Carnitine)       | HMDB0000791             | No  | ↓         | HTN             | 83    |
| octanoylcarnitine     | Lipid                  | Fatty Acid Metabolism(Acyl Carnitine)       | HMDB0000791             | No  | ↑   ↑     | SBP   DBP       | 26    |
| oleate (18:1n9)       | Lipid                  | Fatty Acid Metabolism(Acyl Carnitine)       | HMDB0000207             | No  | ↑   ↑   ↑ | SBP   DBP   HTN | 26,79 |
| oleoylcarnitine       | Lipid                  | Fatty acid                                  | HMDB0005065             | No  | ↑   ↑     | SBP   DBP       | 26    |
| Ornithine             | Amino Acid             | Urea cycle; Arginine and Proline Metabolism | HMDB03374               | No  | ↑ ↓       | HTN             | 83,85 |
| Ornithine/Citruline   | Amino Acid             | Urea cycle; Arginine and Proline Metabolism | HMDB03374 / HMDB0000904 | No  | ↑         | HTN             | 83    |
| Oxalic acid           | Cofactors and Vitamins | Ascorbate and Aldarate Metabolism           | HMDB02329               | No  | ↑         | HTN             | 81,85 |
| p-cresol sulfate      |                        |                                             | HMDB0011635             | Yes | ↓   ↓     | SBP   DBP       | 26    |
| palmitate (16:0)      | Lipid                  | Long Chain Fatty Acid                       | HMDB00220               | No  | ↑   ↑   ↑ | SBP   DBP   HTN | 26,79 |
| Palmitic amide        | Lipid                  | Fatty acid                                  | HMDB0012273             | No  | ↑         | HTN             | 79    |
| palmitoleate (16:1n7) | Lipid                  | Long Chain Fatty Acid                       | HMDB0003229             | No  | ↑   ↑   ↑ | SBP   DBP   HTN | 26,79 |

|                          |             |                                       |                           |     |       |           |    |
|--------------------------|-------------|---------------------------------------|---------------------------|-----|-------|-----------|----|
| palmitoylcarnitine       | Lipid       | Fatty Acid Metabolism(Acyl Carnitine) | HMDB00222                 | No  | ↑   ↑ | SBP   DBP | 26 |
| paraxanthine             | xenobiotics | Drug                                  | HMDB0001860               | No  | ↑   ↑ | SBP   DBP | 26 |
| PC 34:4                  | Lipid       | Phospholipid Metabolism               | HMDB0008007               | No  | ↑   ↑ | DBP   MAP | 86 |
| PC(14:018:1)             | Lipid       | Phospholipid Metabolism               | HMDB0007886 / HMDB0008124 | No  | ↑     | HTN       | 79 |
| PC(16:1/22:3)            | Lipid       | Phospholipid Metabolism               | HMDB0007998 / HMDB0013457 | No  | ↑     | HTN       | 79 |
| PC(18:0/20:4)            | Lipid       | Phospholipid Metabolism               | HMDB0008034 / HMDB0008428 | No  | ↑     | HTN       | 79 |
| pentadecanoate (15:0)    | Amino Acid  | Phenylalanine and Tyrosine Metabolism | HMDB0059870               | No  | ↑   ↑ | SBP   DBP | 26 |
| phenylacetylglutamine    | Amino Acid  | Phenylalanine and Tyrosine Metabolism | HMDB06344                 | Yes | ↓   ↓ | SBP   DBP | 26 |
| Phenylalanine            | Amino Acid  | Phenylalanine and Tyrosine Metabolism | HMDB00159                 | No  | ↑     | HTN       | 81 |
| Phenylalanine / Tyrosine | Amino Acid  | Phenylalanine and Tyrosine Metabolism | HMDB00159 / HMDB0000158   | No  | ↓     | HTN       | 83 |
| phenyllactate            | Peptide     | Dipeptide                             | HMDB0000779               | Yes | ↑   ↑ | SBP   DBP | 26 |

|                             |              |                                                  |                 |     |            |                      |       |
|-----------------------------|--------------|--------------------------------------------------|-----------------|-----|------------|----------------------|-------|
| Phosphatidylserine (PS)     | Energy       | Oxidative Phosphorylation                        | HMDB001429<br>1 | No  | ↓          | HTN and pre-HTN      | 27    |
| Phytol                      | Lipid        | phospholipid                                     | HMDB000201<br>9 | No  |            | SBP   DBP            | 80    |
| PI 34:1                     | Lipid        | phospholipid                                     | HMDB000978<br>3 | No  | ↑          | MAP                  | 86    |
| PI 36:2                     | Lipid        | phospholipid                                     | HMDB000983<br>7 | No  | ↑   ↑      | SBP   MAP            | 86    |
| PI 40:6                     | Lipid        | phospholipid                                     | HMDB000988<br>4 | No  | ↑          | DBP                  | 86    |
| Proline-betaine             | Amino Acid   | Urea cycle; Arginine and Proline Metabolism      | HMDB000482<br>7 | Yes | ↓↑   ↓   ↓ | HTN   SBP   DBP      | 60,75 |
| Propionate                  | Lipid        | Fatty acid                                       | HMDB000023<br>7 | Yes | ↓          | Average BP (SBP DBP) | 84    |
| Pyrazine 2,5 dihydroxy NIST | Nucleotide   | Pyrimidine Metabolism, Uracil containing         |                 | No  |            | SBP   DBP            | 80    |
| pyroglutamylglycine         | Peptide      | Dipeptide                                        | HMDB006189<br>0 | No  | ↑          | HTN                  | 60    |
| Pyrophosphate               | Peptide      | Dipeptide                                        | HMDB000025<br>0 | No  | ↑          | HTN                  | 85    |
| S-carboxymethyl-l-cysteine  | Carbohydrate | Pentose Metabolism                               | HMDB002941<br>5 | No  | ↓          | HTN and pre-HTN      | 27    |
| S-carboxymethyl-l-cysteine  | Carbohydrate | Pentose Metabolism                               | HMDB002941<br>5 | No  | ↑          | HTN                  | 81    |
| salicylate                  | Amino Acid   | Methionine, Cysteine, SAM and Taurine Metabolism | HMDB003201<br>8 | No  | ↑          | HTN                  | 60    |
| Shikimic acid               | Amino Acid   | Methionine, Cysteine, SAM and Taurine Metabolism | HMDB000307<br>0 | No  | ↑          | HTN                  | 81    |
| stearate (18:0)             | Lipid        | Long Chain Fatty Acid                            | HMDB00827       | No  | ↑   ↑      | SBP   DBP            | 26    |

|                                             |             |                                             |                                      |     |       |                      |       |
|---------------------------------------------|-------------|---------------------------------------------|--------------------------------------|-----|-------|----------------------|-------|
| stearidonate (18:4n3)                       | Lipid       | Polyunsaturated Fatty Acid (n3 and n6)      | HMDB06547                            | No  | ↑   ↑ | SBP   DBP            | 26    |
| stearoylcarnitine                           | Lipid       | Fatty Acid Metabolism(Acyl Carnitine)       | HMDB00848                            | No  | ↑   ↑ | SBP   DBP            | 26    |
| Succinyl- /methylmalonylcarnitine           | Xenobiotics | Chemical                                    | HMDB000102<br>2 /<br>HMDB001313<br>3 | No  | ↓     | HTN                  | 83    |
| Talose                                      | Xenobiotics | Chemical                                    | HMDB000139<br>1                      | No  | ↑     | HTN                  | 81    |
| Tetradecadienoylcarnitine                   | Lipid       | Secondary Bile Acid Metabolism              |                                      | No  | ↓     | HTN                  | 83    |
| tetradecanedioate                           | Lipid       | Fatty Acid, Dicarboxylate                   | HMDB00872                            | No  | ↑   ↑ | SBP   DBP            | 26    |
| Tetradecenoylcarnitine                      | Lipid       | Fatty Acid, Dicarboxylate                   | HMDB000201<br>4                      | No  | ↓ ↑   | HTN                  | 79,83 |
| Tetradecenoylcarnitine / Palmitoylcarnitine | Lipid       | Fatty Acid, Dicarboxylate                   | HMDB000201<br>4 /<br>HMDB000022<br>2 | No  | ↓     | HTN                  | 83    |
| theobromine                                 | Xenobiotics | Xanthine Metabolism                         | HMDB02825                            | No  | ↑   ↑ | SBP   DBP            | 26    |
| theophylline                                | Xenobiotics | Xanthine Metabolism                         | HMDB01889                            | No  | ↑   ↑ | SBP   DBP            | 26    |
| Threonine                                   | Amino Acid  | Glycine, Serine and Threonine Metabolism    | HMDB00167                            | No  | ↑     | HTN                  | 60,81 |
| Thymol                                      | Nucleotide  | Pyrimidine Metabolism, Thymine containing   | HMDB00262                            | No  | ↑     | HTN                  | 81    |
| Total short-chain fatty acids               | Lipid       | Fatty acid                                  |                                      | Yes | ↓     | Average BP (SBP DBP) | 84    |
| trans-Hexadec-2-enoyl carnitine             | Amino Acid  | Urea cycle; Arginine and Proline Metabolism | HMDB000631<br>7                      | No  | ↑     | HTN                  | 79    |

|                         |                        |                                             |           |    |              |                    |       |
|-------------------------|------------------------|---------------------------------------------|-----------|----|--------------|--------------------|-------|
| Trihydroxypyrazine NIST | Cofactors and Vitamins | Nicotinate and Nicotinamide Metabolism      |           | No |              | SBP   DBP          | 80    |
| Tyrosine                | Amino Acid             | Phenylalanine and Tyrosine Metabolism       | HMDB00158 | No | ↑            | HTN                | 81    |
| Uric acid               | Amino Acid             | Urea cycle; Arginine and Proline Metabolism | HMDB00294 | No | ↑   ↑  <br>↑ | SBP   DBP<br>  HTN | 26,85 |
